# Supplementary material for: Energy harvesting using two-dimensional (2D) d-silicates from abundant natural minerals
Source: Royal Society of Chemistry journal article supplement (doi:10.1039/d2tc04605a), 2023-01-01
Supplement: d2tc04605a1.pdf [file d2tc04605a1.pdf]

## Energy harvesting using two-dimensional (2D) d-Silicates from abundant natural minerals

Preeti Lata Mahapatra<sup>a</sup>, Appu Kumar Singh<sup>b</sup>, Raphael Tromer<sup>c</sup>, Karthik R.<sup>b</sup>, Ambresha M.<sup>d</sup>, Gelu Costin<sup>e</sup>, Basudev Lahiri<sup>f</sup>, Tarun Kumar Kundu<sup>b</sup>, P. M. Ajayan<sup>g</sup>, Eric I. Altman<sup>h</sup>, Douglas S. Galvao<sup>\*c</sup>, Chandra Sekhar Tiwary<sup>\*b</sup>

<sup>a</sup>School of NanoScience and Technology, Indian Institute of Technology, Kharagpur, West Bengal-721302 India

<sup>b</sup>Metallurgical and Materials Engineering, Indian Institute of Technology Kharagpur, Kharagpur 721302, India

<sup>c</sup>Applied Physics Department, and Center for Computational Engineering & Sciences (CCES), State University of Campinas, Campinas, SP, 13083-970, Brazil

<sup>d</sup>Materials Engineering, Indian Institute of Science, Bangalore, India-560012

<sup>e</sup>Department of Earth, Environmental and Planetary Sciences, Rice University, Houston, Texas 77005, United States

<sup>f</sup>Department of Electronics and Electrical Communication Engineering, Indian Institute of Technology Kharagpur, Kharagpur 721302, India

<sup>g</sup>Department of Materials Science and Nanoengineering, Rice University, 6100 S Main Street, Houston, TX, 77005, United States

<sup>h</sup>Department of Chemical and Environmental Engineering, Yale University, New Haven, Connecticut 06520, United States

\*Corresponding author E-mail: [chandra.tiwary@metal.iitkgp.ac.in](mailto:chandra.tiwary@metal.iitkgp.ac.in), [galvao@ifi.unicamp.br](mailto:galvao@ifi.unicamp.br)

### Supporting information

#### Synthesis procedure

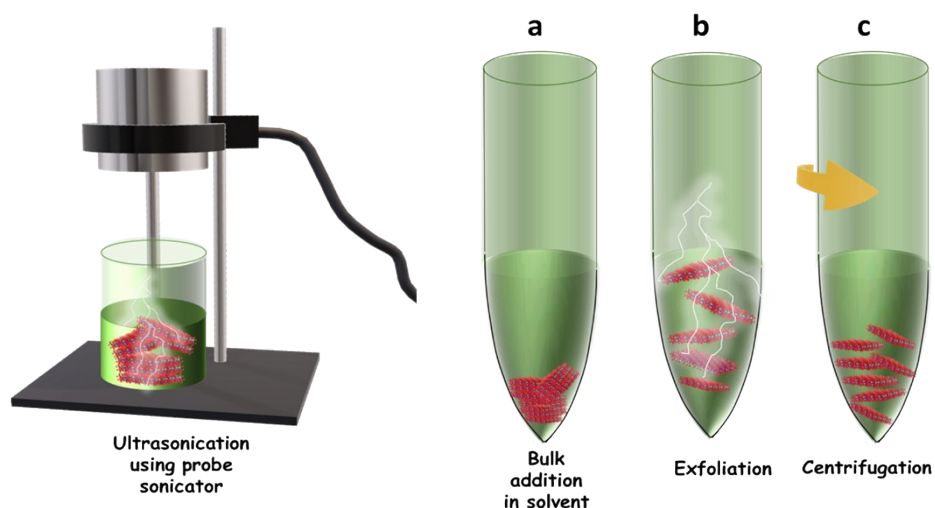

**Fig. S1:** Synthesis of 2D d-silicate via liquid phase exfoliation.

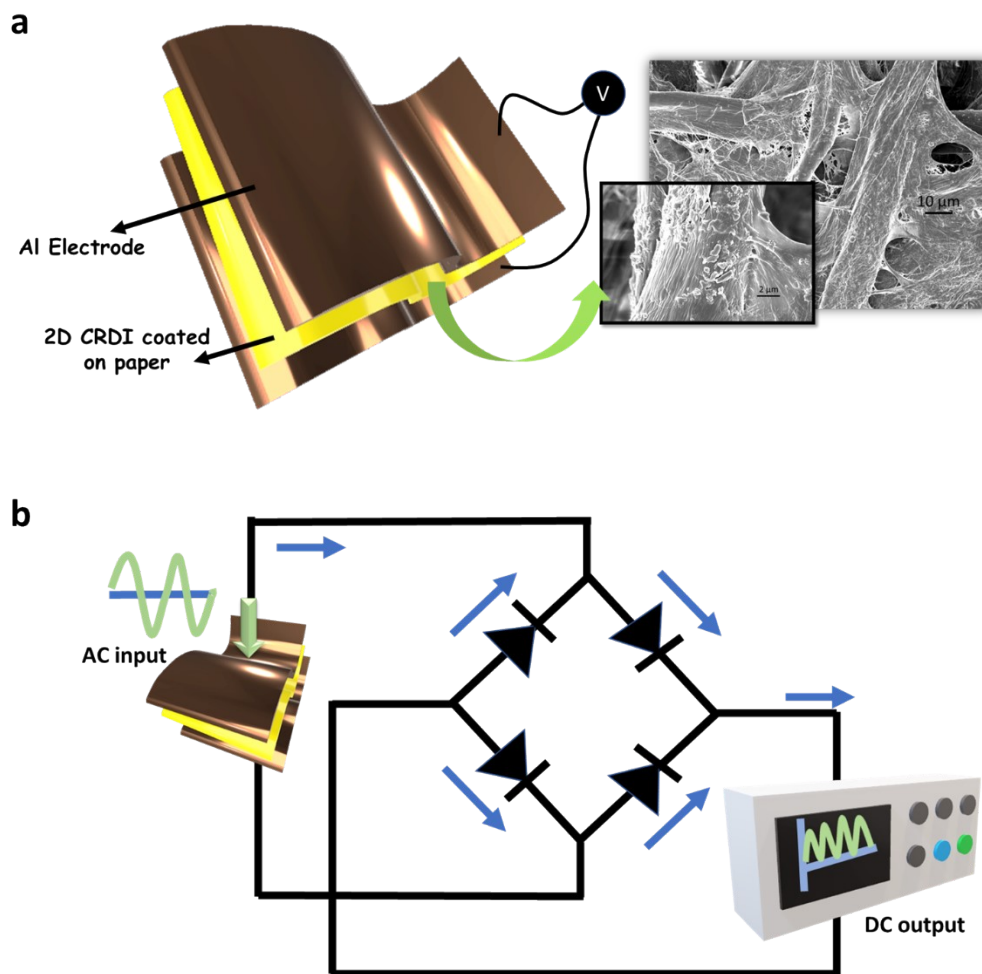

**Fig. S2:** Schematic of (a) fabrication design of flexible energy harvesting device with 2D d-silicate and SEM image of cellulose interaction with 2D d-silicate flakes, and (b) Bridge-rectifier circuit for converting AC voltage into pulsating DC voltage for use in power supplies.

**Response measurement conditions:**

Here the measurements were carried out at room temperature of about 307K, the force values varied from 0 to 5.88N. The device was kept on an insulated surface (paper sheet) and force was applied from one side of the device. The voltage output readings were recorded with a connected oscilloscope system. The noise value upon no load application was around 0.2V due to environmental factors. The signals are alternating positive and negative cycle sinusoidal waves due to the capacitor configuration. For application in DC devices where direct charging is required, a rectified electrical signal is needed. Mostly the AC to DC signal is achieved by employing a bridge rectifier circuit (as shown in Figure S2 (b)) where the signal can be rectified either to the positive or negative side.

**Electron probe micro-analysis (EPMA)**

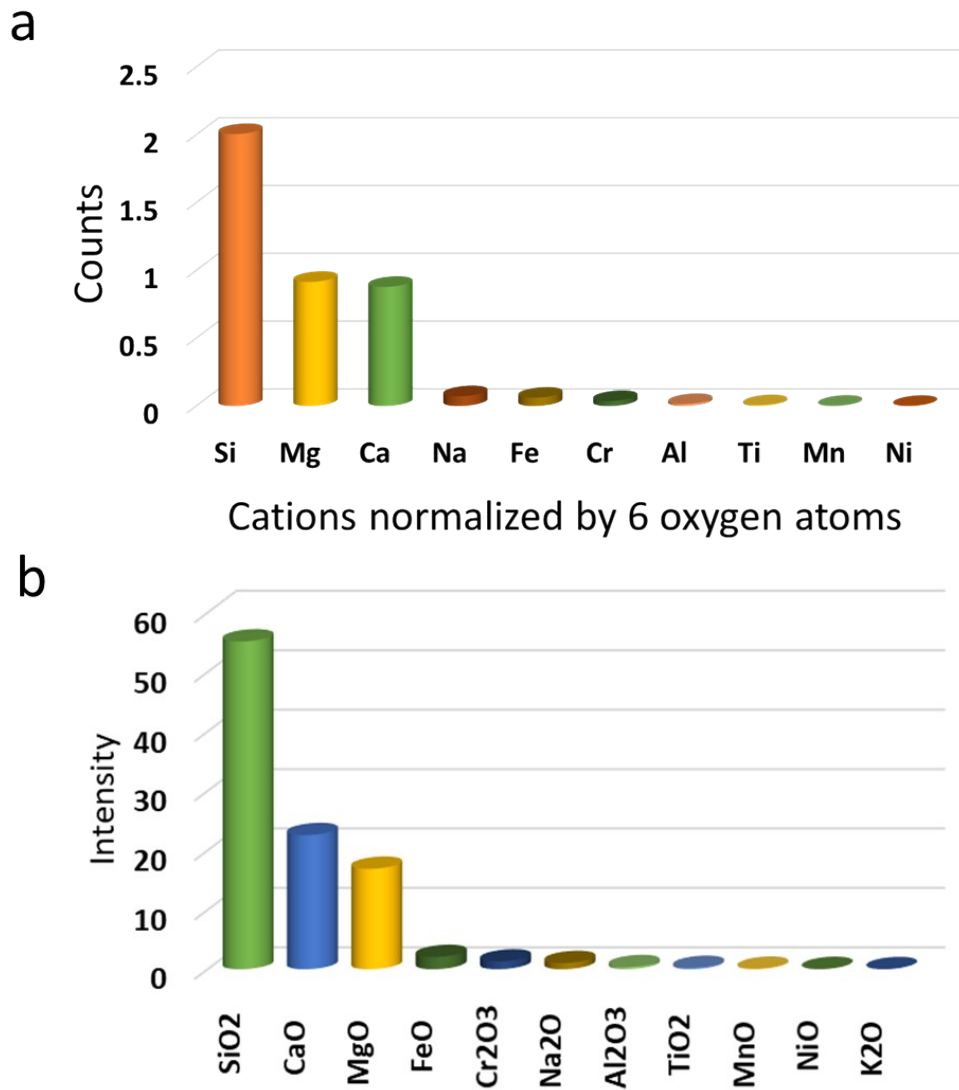

**Fig. S3:** (a) EPMA study of cations normalized by 6 oxygen atoms, and (b) EPMA quantification of oxide compounds in bulk diopside.

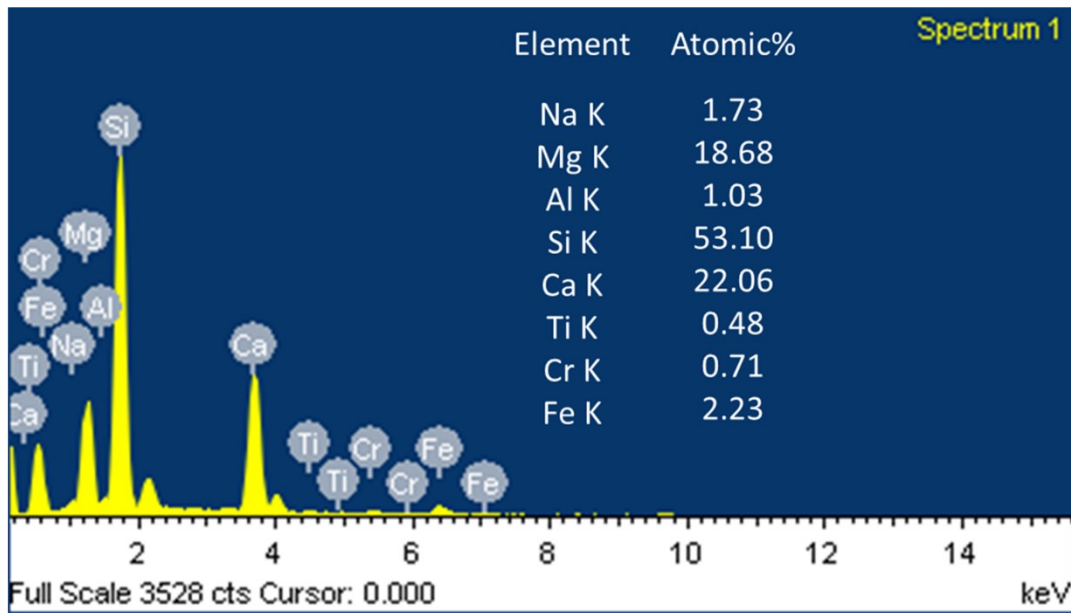

**Fig. S4:** EDX spectroscopy analysis showing atomic % of each element present.

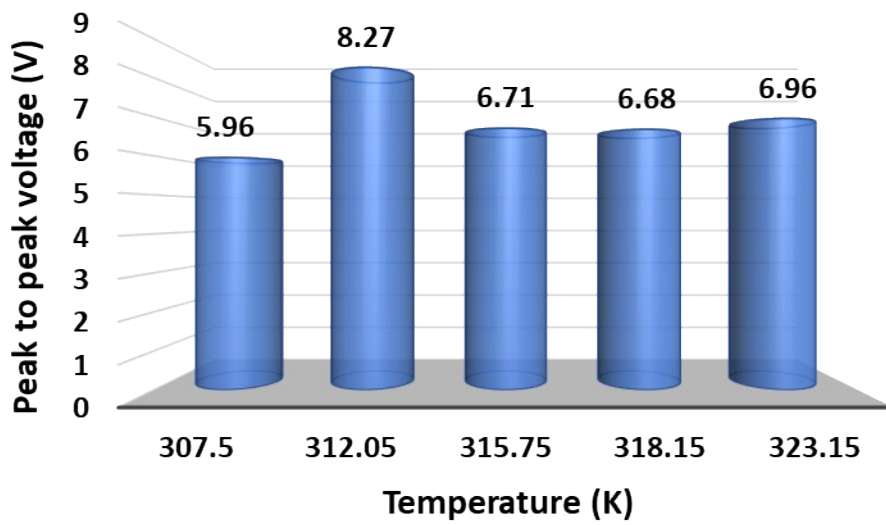

**Fig. S5:** Bar graph showing net peak-to-peak voltage output at various temperatures(K) with 0.98 N force.

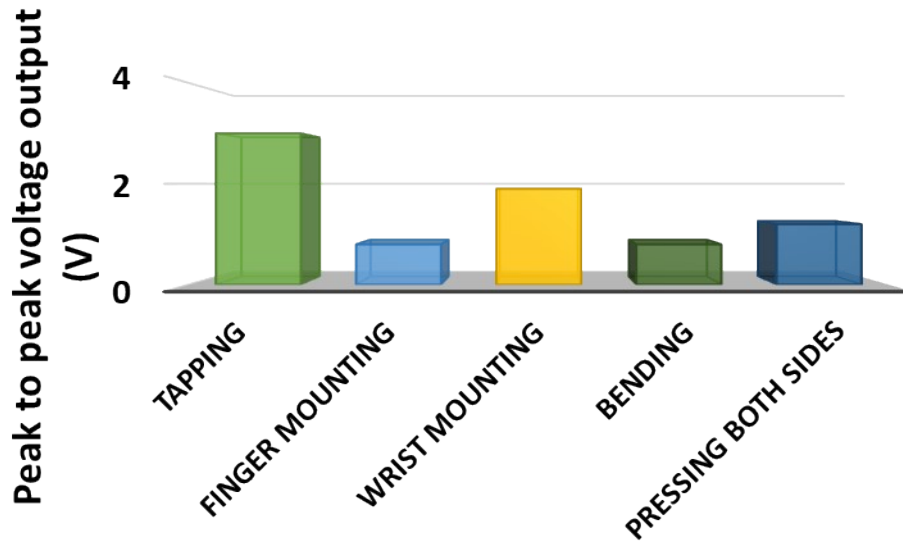

**Fig. S6:** Bar graph showing peak-to-peak voltage output for different physiological movements with the 2D *d*-silicate device.

#### DFT calculation details:

##### The measurement process and parameters for electrostatic potential:

The structure of the crystal planes and their orientation has a dependency on the work function values. The spatial distribution of the electrostatic potential in a vacuum was calculated far from the surface. Calculations were performed with the same settings applied during the variable cell relaxation. The results of the calculation are presented in Table 1 below.

**Table-1: Anisotropy calculation summary for 2D *d*-silicate (1 au = 0.97 x 10<sup>22</sup> V/m<sup>2</sup>).**

| Atoms | V <sub>xx</sub> [au] | V <sub>yy</sub> [au] | V <sub>zz</sub> [au] | $\eta$ | Mulliken charges (e) |
|-------|----------------------|----------------------|----------------------|--------|----------------------|
| O     | -0.358               | 0.2898               | 0.0682               | 0.2057 | -1.23                |
| Si    | 0.247                | 0.0228               | -0.2698              | 0.6229 | 1.97                 |
| O     | -0.3281              | -0.1963              | 0.5244               | 0.3163 | -1.21                |
| O     | 0.5102               | -0.3348              | -0.1754              | 0.2926 | -1.16                |
| Si    | 0.3225               | -0.5548              | 0.2323               | 0.2881 | 1.92                 |
| O     | -0.3815              | 0.6316               | -0.2501              | 0.2471 | -1.10                |
| O     | -0.1479              | 0.5755               | -0.4276              | 0.5522 | -1.19                |
| O     | 0.548                | -0.2804              | -0.2676              | 0.0226 | -1.16                |

|    |         |         |         |        |       |
|----|---------|---------|---------|--------|-------|
| Si | 0.2484  | 0.0185  | -0.2669 | 0.632  | 1.97  |
| O  | -0.3577 | 0.297   | 0.0607  | 0.2046 | -1.23 |
| O  | -0.3249 | -0.2043 | 0.5292  | 0.296  | -1.21 |
| O  | 0.5103  | -0.3371 | -0.1732 | 0.2943 | -1.17 |
| Si | 0.3207  | -0.5515 | 0.2307  | 0.2874 | 1.92  |
| O  | -0.3854 | 0.6319  | -0.2466 | 0.2472 | -1.10 |
| O  | -0.1501 | 0.5762  | -0.4261 | 0.5489 | -1.19 |
| O  | 0.5486  | -0.281  | -0.2676 | 0.0177 | -1.16 |
| Mg | 0.0246  | -0.1701 | 0.1455  | 0.5555 | 1.45  |
| Ca | -0.1867 | -0.2305 | 0.4172  | 0.3855 | 1.71  |
| Mg | 0.02    | -0.165  | 0.1451  | 0.5973 | 1.45  |
| Ca | -0.1812 | -0.2363 | 0.4175  | 0.3664 | 1.71  |

The atomic information for the structural model is shown below:

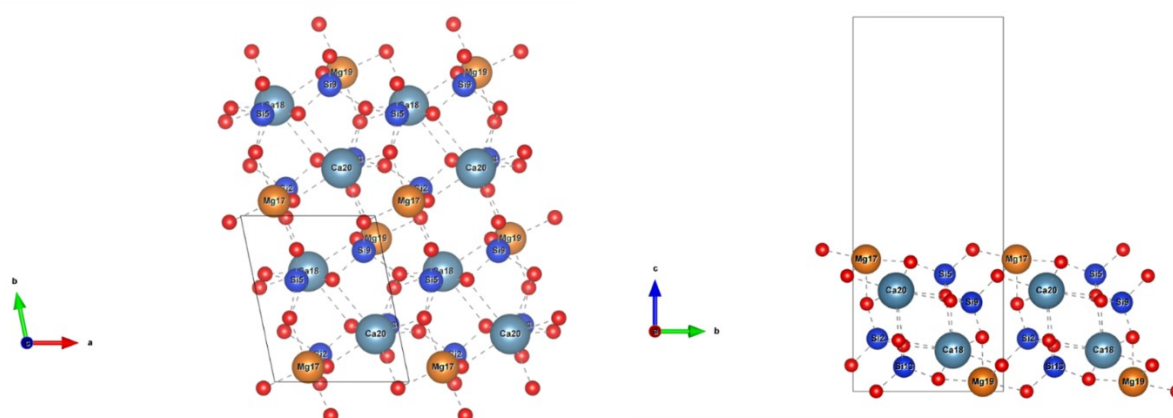

**Figure R1:** 2D crystal structure of *d*-silicate, left and right view, used for DFT calculations.

The structural formula is  $ABSi_2O_6$ , with A represented as  $Ca_{0.89}Na_{0.073}Mg_{0.037}Mn_{0.002}$  in solid solution at the A site and  $Mg_{0.879}Fe^{2+}_{0.062}Cr_{0.037}Al_{0.015}Ti_{0.006}Ni_{0.001}$  at the B site.

Lattice parameters

|         |         |         |         |          |         |
|---------|---------|---------|---------|----------|---------|
| a       | b       | c       | alpha   | beta     | gamma   |
| 9.69300 | 8.88900 | 5.25300 | 90.0000 | 106.3400 | 90.0000 |

Unit-cell volume = 434.323036 Å<sup>3</sup>

Structural parameters

| x | y | z | Occ. | U | Site | Sym. |
|---|---|---|------|---|------|------|
|---|---|---|------|---|------|------|

|        |         |         |          |       |       |    |   |
|--------|---------|---------|----------|-------|-------|----|---|
| Mg Mg1 | 0.00000 | 0.90680 | 0.25000  | 0.790 | 0.006 | 4e | 2 |
| Cr Cr1 | 0.00000 | 0.90680 | 0.25000  | 0.090 | 0.006 | 4e | 2 |
| Al Al1 | 0.00000 | 0.90680 | 0.25000  | 0.070 | 0.006 | 4e | 2 |
| Fe Fe1 | 0.00000 | 0.90680 | 0.25000  | 0.050 | 0.006 | 4e | 2 |
| Ca Ca2 | 0.00000 | 0.30080 | 0.25000  | 0.780 | 0.010 | 4e | 2 |
| Na Na2 | 0.00000 | 0.30080 | 0.25000  | 0.180 | 0.010 | 4e | 2 |
| Mg Mg2 | 0.00000 | 0.30080 | 0.25000  | 0.040 | 0.008 | 4e | 2 |
| Si Si  | 0.28770 | 0.09270 | 0.23090  | 0.985 | 0.004 | 8f | 1 |
| Al Al  | 0.28770 | 0.09270 | 0.23090  | 0.015 | 0.004 | 8f | 1 |
| O O1   | 0.11500 | 0.08530 | 0.14050  | 1.000 | 0.008 | 8f | 1 |
| O O2   | 0.36140 | 0.25190 | 0.31700  | 1.000 | 0.010 | 8f | 1 |
| O O3   | 0.35130 | 0.01680 | -0.00190 | 1.000 | 0.007 | 8f | 1 |
